# The Effects of *d*-Tubocurarine and Its Commercial Vehicles on Cardiac Function

Oliver Carrier, Jr., Ph.D.,\* and James C. Murphy, M.S.†

*d*-Tubocurarine has been reported to have a depressant effect on cardiac tissues, an effect reversed by high calcium concentrations. Results of this study showed that the depressant effect (20 to 50 per cent of control tension) could be accounted for by the benzyl alcohol or 4-chloro-3-methyl cresol used as preservatives in commercial preparations of *d*-tubocurarine. The effects of these compounds were reversed by increasing the calcium chloride content of the Ringer's solution 25 to 100 per cent (3.0 to 4.8 mM). The findings of previous workers may have reflected the effects of these two substances rather than a depressant effect of the *d*-tubocurarine. (Key words: *d*-Tubocurarine; Cardiac function.)

IT HAS BEEN REPORTED that *d*-tubocurarine has a cardiac depressant effect<sup>1,2</sup> which can be reversed by high calcium concentrations.<sup>4</sup> Some investigators believe this depressant effect is the result of histamine release by *d*-tubocurarine.<sup>1,2</sup> Others claim a direct cardiac action for the drug.<sup>3,5</sup> In our studies we have been interested in involvement of calcium ion in vascular and cardiac muscle function. We have used reserpine to modify vascular calcium content and, we believe, availability to the contractile apparatus.<sup>6,7</sup> We thus became interested in the possibility of a curare-reserpine-calcium interaction at various muscle sites. In one study<sup>8</sup> we found that reserpine decreased the apparent potency of *d*-tubocurarine at the skeletal neuromuscular junction. We, therefore, decided to study this relationship in the heart. However, in the initial

phase of the study we were unable to demonstrate any cardiac depressant activity with *d*-tubocurarine, nor any calcium-curare relationship in the isolated rabbit atrial preparation. Further work to resolve this difference between our results and those of the previous workers was needed. The results of this study are the subject of the present report. The cardiac depressant effect which had been attributed to *d*-tubocurarine resulted from the preservatives used in the injection preparations of the drug, and *d*-tubocurarine, *per se*, had none.

## Methods

### EXPERIMENTAL PROCEDURES

Albino New Zealand rabbits weighing approximately 1 kg were used in the study. Each animal was sacrificed by a sharp blow to the head, and the heart was excised immediately. The hearts were placed in oxygenated Ringer's solution and the atria removed. Atria were suspended in organ baths (50 ml) in Ringer's solution (composition: NaCl, 154 mM; KCl, 5.4 mM; CaCl<sub>2</sub>, 2.4 mM; NaHCO<sub>3</sub>, 6 mM; dextrose 11 mM; distilled water to 1 liter). Tension measurements were made with "E and M" myographs and recording equipment (Physiograph) after adjusting the diastolic tension of the atria to 1 gram. Three preparations were used in these studies: the spontaneously-beating right atrium, spontaneously-beating left and right atria, and the electrically-driven left atrium. Left atria were stimulated at a frequency of 1/sec with supra-maximal square-wave stimulation 3 msec in duration. Recording of contractile amplitude and rate was begun immediately after the atria were mounted. A 30-minute equilibration period preceded the final adjustment to 1-gram tension, and a second 30-minute equilibration period followed prior to the addition of drugs or calcium. After the equilibration period, *d*-

\* Associate Professor and Director of Graduate Education in Pharmacology.

† Predoctoral Fellow.

Received from the Department of Pharmacology and Toxicology, University of Texas Medical School at San Antonio, San Antonio, Texas 78229. Accepted for publication September 14, 1970. Supported by a Public Health Service General Research Support Grant and USAF Grant AFOSR-69-1775. A preliminary report of the work was presented at the fall 1969 meeting of the American Society of Pharmacology and Experimental Therapeutics at Pittsburgh, Pennsylvania.



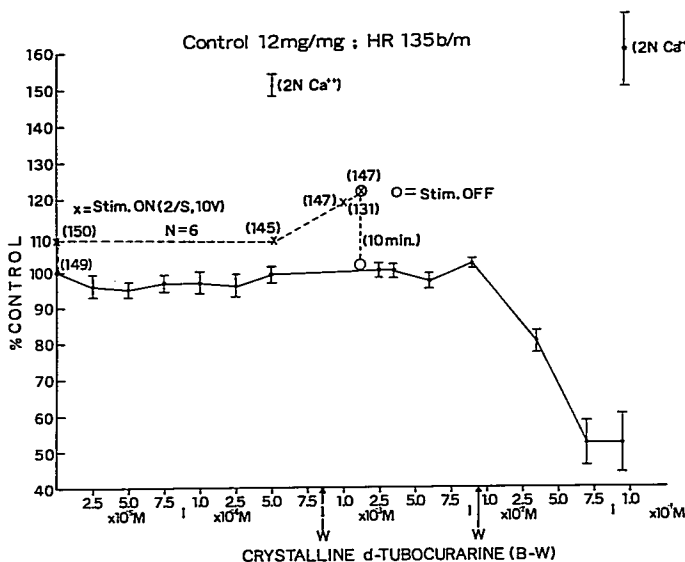

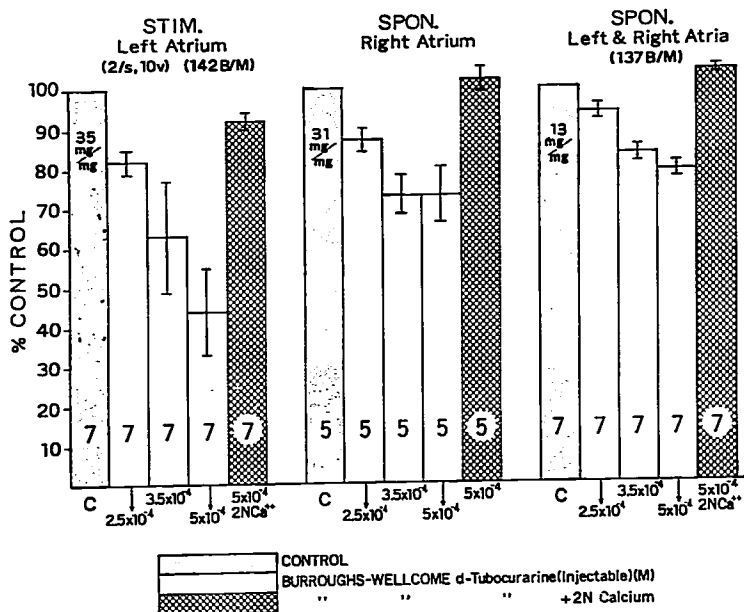

FIG. 3. Depressant effect of injectable *d*-tubocurarine preparations and reversal by the addition of calcium. Control tension is given in the first bar for each preparation. Heart rates are shown at the top. The rate of the spontaneous right atrium was not significantly different from that of spontaneous left-right atria. Ordinate, contractile tension as per cent of control; abscissa, molar concentration of *d*-tubocurarine. Vertical bars, standard errors of the means.

final concentration) there was a significant increase in contractile tension of normal atria. *d*-Tubocurarine ( $2.5$ – $3.5 \times 10^{-3}$  M) had no significant effect on the tension of these atria in the presence of high calcium concentrations (bar graph on the right in figure 1). In figure 2 we show the results of an experiment to test the effect of stimulation on the left and right atrial preparation treated with *d*-tubocurarine ( $2.5 \times 10^{-3}$ – $10^{-1}$  M). (Previous investigators reporting curare depression used the stimulated left atrial preparation.<sup>4</sup>) Stimulation at 2/sec (10 v) increased contractile tension about 10 per cent; however, *d*-tubocurarine had no depressant effect on either preparation up to  $10^{-3}$  M. From  $10^{-2}$  M *d*-tubocurarine to  $10^{-1}$  M, a progressive decline in tension was observed. The addition of two

times normal calcium (final concentration three times normal, 7.2 mM,  $\text{CaCl}_2$ ) increased the tensions of both stimulated and unstimulated atrial preparations (41 and 52 per cent, respectively) in the presence of  $5 \times 10^{-3}$  M tubocurarine. The addition of 2 N calcium in the presence of  $10^{-1}$  M *d*-tubocurarine increased atrial tension from 52 per cent to 160 per cent of control.

#### EFFECTS OF INJECTABLE *d*-TUBOCURARINE ON THE CONTRACTILE TENSION OF RABBIT ATRIA

A depressant effect of Burroughs Wellcome injectable *d*-tubocurarine on contractile tension was found in the stimulated left atrial, spontaneous right atrial, and spontaneous left and right atrial preparations (fig. 3). There

was a direct relationship between the depression observed and the concentration of drug used for each preparation. The stimulated left atrial preparation was depressed far more than either of the spontaneous preparations. In the latter there was no further significant depression at concentration of *d*-tubocurarine above  $3.5 \times 10^{-4}$  M. In each case when the calcium content of Ringer's solution was increased by twice the normal concentration (final concentration three times normal, 7.2 mM  $\text{CaCl}_2$ ) the depression was completely reversed. In figure 4 the depressant effect of Abbott's injectable *d*-tubocurarine on contractile tension is shown. These results are similar to those obtained with the Burroughs Wellcome product. Similar experiments with Squibb's injectable *d*-tubocurarine produced similar results. In figure 4 results obtained with the two vehicles for *d*-tubocurarine, Abbott 3386 and 3841, are illus-

trated. Vehicle 3386 had a depressant effect similar to that of the injectable tubocurarine, while 3841 did not. The depression resulting from 3386 was reversed by calcium. The depression by 3386 obtained upon the addition of 1.0 ml to the bath was not significantly different from that obtained with  $8 \times 10^{-5}$  M *d*-tubocurarine (final bath concentration upon the addition of 1 ml of the injectable drug to the bath). The vehicle used for Abbott's injectable tubocurarine chloride in these experiments was identical to 3386.

#### EFFECTS OF BENZYL ALCOHOL AND 4-CHLORO-3-METHYL PHENOL ON ATRIAL TENSION

The depressant effects of Squibb's and Abbott's *d*-tubocurarine on atrial tension resulted from the benzyl alcohol contained in their vehicles (fig. 5). Benzyl alcohol had the depressant effect previously accredited to the *d*-tubo-

Control  $14.8 \pm 2 \text{ mg/mg, } 141 \text{ B/M}$

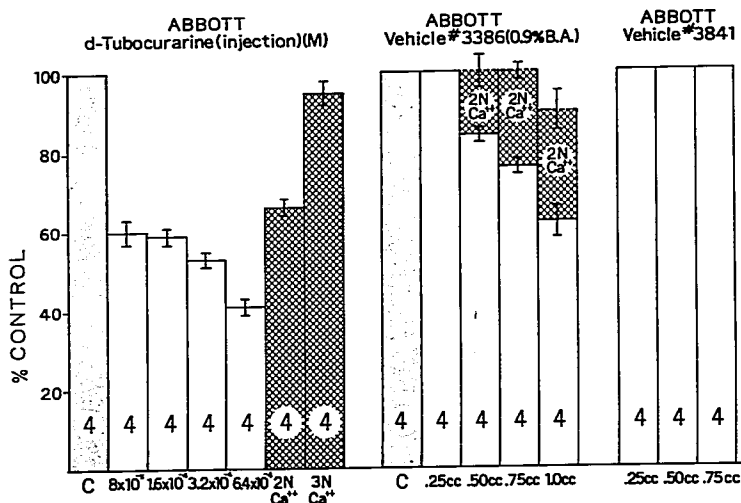

FIG. 4. Depressant effects of Abbott's injectable *d*-tubocurarine and vehicles 3386 and 3841 and calcium reversal. Control tension and rate at top of figure. Ordinate, contractile tension as per cent of control; abscissa, molar concentration of *d*-tubocurarine, calcium concentration as multiple of normal ( $N = 2.4 \text{ mM}$ ), and volume of vehicle delivered. Numbers at lower parts of bars, numbers of atria tested; verticle bars, standard errors of the means.

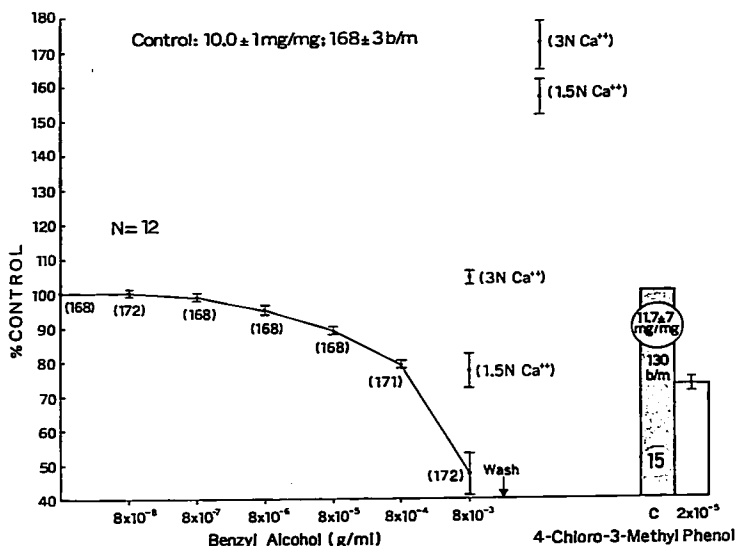

FIG. 5. Depressant effects of benzyl alcohol and 4-chloro-3-methyl phenol on the unstimulated left and right rabbit atrial preparation. Reversal by the addition of calcium is shown by isolated points in the figure both before and after washing (at "wash" arrow). Control rate and tension for atria tested with benzyl alcohol are given at the top, for those tested with the phenol, rate and tension are shown in control bar. Numbers in parentheses under the curve indicate heart rate. N, number of atria. Number in lower part of shaded bar, number of atria. Ordinate, contractile tension as per cent of control; abscissa, concentrations of benzyl alcohol and phenol in g/ml.

curarine. The active preservative in the Burroughs Wellcome product is 4-chloro-3-methyl phenol. When tested in 15 preparations, it reduced the tension of the spontaneous right and left atrial preparation  $30 \pm 5$  per cent at  $2 \times 10^{-5}$  g/ml. The addition of calcium to as much as two times normal reversed both the benzyl alcohol and the phenol depressions.

#### EFFECTS OF ADDITION OF BENZYL ALCOHOL TO ATRIAL PREPARATIONS AFTER ADDITION OF CALCIUM

Experiments were done to determine the effects of pretreatment of the isolated atria with high calcium concentrations prior to the addition of benzyl alcohol, and benzyl alcohol plus *d*-tubocurarine. Results of these experiments are presented in table 1. At 1.25 nor-

mal calcium (final concentration),  $10^{-7}$  to  $10^{-4}$  g/ml benzyl alcohol reversed slightly the positive inotropic effect of the calcium. At 1.5 and 2.0 normal calcium, benzyl alcohol did not overcome the calcium response. At 2.5 normal calcium, the addition of the alcohol resulted in arrhythmias in all instances, so that the experiments were terminated. Addition of 1 mg of *d*-tubocurarine with each mg of benzyl alcohol did not affect these results. In these experiments the increase in calcium caused an increase in heart rate as well as an inotropic response. At 1.25 normal calcium,  $10^{-3}$  g/ml benzyl alcohol brought the rate back to control from an increase of 25 per cent above control. At 1.5 normal calcium, benzyl alcohol only decreased the rate toward normal, about 10 per cent. At higher calcium concen-

TABLE 1. Effects of Benzyl Alcohol on Atrial Preparations after the Addition of Calcium (Control Tension  $16 \pm 1$  mg/mg; Control Rate  $137 \pm 2$  beats/min)

| Number of Atria Tested | Calcium Concentration Times Normal (2.4 mM) | Change after Calcium |                 | Change after Calcium + Benzyl Alcohol* |                 |
|------------------------|---------------------------------------------|----------------------|-----------------|----------------------------------------|-----------------|
|                        |                                             | Tension (Per Cent)   | Rate (Per Cent) | Tension (Per Cent)                     | Rate (Per Cent) |
| 7                      | 1.25                                        | $+45 \pm 1$          | $+25$           | $-55 \pm 1$ †                          | $-25$ †         |
| 4                      | 1.50                                        | $+85 \pm 3$          | $+25$           | $-30 \pm 10$                           | $-10$           |
| 4                      | 2.0                                         | $+120 \pm 5$         | $+26$           | $-30 \pm 8$                            | 0               |
| 4                      | 2.50                                        | $+240 \pm 6$         | $+22$           | Arrhythmias                            | 0               |

\* Atria were subjected in each instance to  $10^{-7}$  to  $10^{-4}$  g/ml benzyl alcohol, with the same result obtained at all concentrations. This amount of benzyl alcohol is equivalent to  $1.1 \times 10^{-4}$  to  $1.1 \times 10^{-1}$  M *d*-tubocurarine. Results obtained with benzyl alcohol plus crystalline *d*-tubocurarine (1 mg for each mg benzyl alcohol) after calcium were not significantly different from those obtained without the *d*-tubocurarine.

† Percent reduction in tension and rate from increased level caused by calcium addition, i.e., benzyl alcohol reduced the rate to control level when added after 1.25 N calcium chloride.

trations benzyl alcohol had no effect. The decrease in rate observed after the addition of the benzyl alcohol to the high-calcium-concentration solution could be restored to the initial high level (25 per cent above control) by the further addition of 0.5 normal calcium (1.2 mM).

#### EFFECTS OF BURROUGHS WELLCOME VEHICLE CONTAINING NEITHER BENZYL ALCOHOL NOR 4-CHLORO-3-METHYL PHENOL

In 20 experiments with the spontaneous left and right atrial preparation this vehicle had no effect on either atrial rate or tension in volumes equivalent to the volumes of the Burroughs Wellcome injectable *d*-tubocurarine, which contained  $10^{-9}$  to  $10^{-2}$  g/ml of 4-chloro-3-methyl phenol.

Except for the experiments in which the calcium concentration was increased before the addition of any other drug no significant changes in heart rate were observed in these studies. When calcium was added first there was usually an increase of about 25 per cent with the initial increase of calcium of one-fourth normal. No further increases were observed with greater amounts of calcium.

#### Discussion

For many years it was assumed that curare had no cardiac effects.<sup>9,10</sup> The absence of clinical or experimental evidence to the contrary attested to the validity of this assumption. In 1965, based on clinical observations of patients in whom *d*-tubocurarine had re-

versed various ventricular arrhythmias, including fibrillation, and upon similar results obtained in dogs,<sup>11</sup> Dowdy and her co-workers studied the effects of *d*-tubocurarine in the isolated perfused rabbit heart. They observed a quinidine-like action of *d*-tubocurarine.<sup>3</sup> These authors did point out at the time that the *d*-curarine did not correct atrial fibrillation. In a subsequent study<sup>4</sup> it was reported that *d*-tubocurarine had a depressant action on the contractile tension of isolated left atria of rabbits which could be reversed by high concentrations of calcium. The results of the present study, however, indicate that *d*-tubocurarine has no depressant effect on atrial muscle except at very high concentrations ( $10^{-2}$  M), but that the vehicles in most commercial preparations contain substances which do depress the contractile tension of atrial tissue. In addition, this depression caused by the solvent is reversible by high calcium concentrations. The minimum concentration used both *in vivo* and *in vitro*<sup>3,4</sup> in the earlier studies ( $10^{-4}$  M), if used in the commercial injectable form (not specified in methods), would be accompanied by  $8 \times 10^{-5}$  M benzyl alcohol or  $7.7 \times 10^{-6}$  M 4-chloro-3-methyl phenol. We have observed that these substances at these concentrations can account for the depressant results obtained.

The authors acknowledge the generosity of Dr. George H. Berryman, Abbott Laboratories; Miss Barbara Stearns, The Squibb Institute; and Drs. W. P. Colvin and Peter Cervoni, Burroughs Wellcome and Co., in supplying the various curare preparations and the placebos.

## References

1. Iwatsuki K, Yusa T, Kataoka Y: Effect of muscle relaxants on ventricular contractile force in dogs. *Tohoku J Exp Med* 86:9, 1965
2. Bouyard P: Aspects pharmacologiques du muscle cardiaque et du muscle strié. *Acta Pharmacol* 14:25, 1961
3. Dowdy EG, Dugger PN, Fabian LW: Effects of neuromuscular blocking agents on isolated digitalized mammalian hearts. *Anesth Analg* 44:608, 1965
4. Sullivan LJ, Dowdy EG: Inhibition by calcium of the depressant action of *d*-tubocurarine in the isolated left atria of rabbit. *Pharmacologist* 10:209, 1968
5. Rudolph C: Action du chlorure de *d*-tubocurarine sur le cœur de grenouille isolé. *Compt Rend Soc Biol* 145:186, 1951
6. Carrier O Jr, Shibata S: A possible role for tissue calcium in reserpine supersensitivity. *J Pharmacol* 155:42, 1967
7. Pegram BL, Carrier O Jr: Change in calcium dependence of isolated arteries after reserpine. *Amer J Physiol* 217:1736, 1969
8. Carrier CO, Pegram BL, Carrier O Jr: Antagonistic effects of reserpine on *d*-tubocurarine action on motor function of rabbits. *Europ J Pharmacol* 6:125, 1969
9. Gray TC, Halton J: A milestone in anesthesia (*d*-tubocurarine chloride). *Proc Roy Soc Med* 39:400, 1946
10. Wylie WD, Churchill-Davidson HC: *A Practice of Anesthesia*. Second edition. Chicago, Year Book Medical Publishers, 1966, p 679
11. Dowdy EG, Fabian LW: Ventricular arrhythmias induced by succinylcholine in digitalized patients: A preliminary report. *Anesth Analg* 42:501, 1963

## Drugs

**BARBITURATE INTOXICATION** Deep coma resulting from barbiturate overdosage was studied in 50 patients. The length of coma correlated with depth of coma and serum barbiturate levels except in those patients who were drug addicts and had hepatic or renal disease. The complications of pneumonia, bleeding of the gastrointestinal tract, urinary-tract infections, and thrombophlebitis were common; however, all patients survived. Treatment was instituted on a rotation basis with supportive care alone, mannitol diuresis, or peritoneal dialysis. Using length of coma, the slope of disappearance of serum barbiturate, and clearance data as indicators of the effectiveness of treatment, the three treatment forms did not differ. Supportive care alone was associated with less local and systemic morbidity and appeared to be the best method of reducing morbidity and mortality in patients after barbiturate overdosage. (Hadden, J., and others: *Acute Barbiturate Intoxication; Concepts of Management*, J.A.M.A. 209: 893 (Aug.) 1969.)

**PROPRANOLOL IN THYROID STORM** Although proper preoperative preparation of the thyrotoxic patient and the therapeutic use of radioactive iodine have reduced the incidence of storm, it is still a serious complication. Treatment is still unsatisfactory, however, as evidenced by the mortality figures (20 to 50 per cent). It has been shown recently that most of the cardiovascular and metabolic manifestations of thyrotoxicosis can be controlled effectively by blockade of the beta-adrenergic receptors of the body. Intravenous administration of propranolol was immediately effective in the management of thyrotoxic storm in a patient who did not respond to other modes of therapy. (Das, G., and Drieger, M.: *Treatment of Thyrotoxic Storm with Intravenous Administration of Propranolol*, Ann. Intern. Med. 70: 985 (May) 1969.)

**RELAXANTS AND OCULAR PRESSURE** Succinylcholine (SCh) increases intraocular pressure in part by contracting extraocular muscles and in part by contracting orbital smooth muscles. If the dose of SCh is large enough to increase arterial pressure, this also contributes to the increase in intraocular pressure. The effects of SCh on extraocular muscles, orbital smooth muscles, and intraocular pressure can be prevented by *d*-tubocurarine, gallamine or hexafluorenum. (Katz, R. L., and Eakins, K. E.: *The Actions of Neuromuscular Blocking Agents on Extraocular Muscle and Intraocular Pressure*, Proc. Roy. Soc. Med., 62: 1217 (Dec.) 1969.)
